# Supplementary material for: GQD-PAN-based high-performance supercapacitor: an approach towards wealth from waste
Source: Royal Society of Chemistry journal article supplement (doi:10.1039/d4su00153b), 2024-01-01
Supplement: d4su00153b1.pdf [file d4su00153b1.pdf]

## GQD-PAN based high-performance supercapacitor – an approach towards wealth from waste

Dheeraj Kumar<sup>A</sup>, Ekta Vashishth<sup>A</sup>, Sweety Rani<sup>A</sup>, Advitiya Kumar<sup>A</sup>, Bhanu Nandan<sup>A</sup>,

Supreet Singh Bahga<sup>B</sup>, Rajiv K. Srivastava<sup>A\*</sup>

<sup>A</sup> Department of Textile and Fibre Engineering, Indian Institute of Technology Delhi, Hauz Khas, New Delhi 110016, INDIA

<sup>B</sup> Department of Mechanical Engineering, Indian Institute of Technology Delhi, Hauz Khas, New Delhi 110016, INDIA

\*Corresponding author, Email: rajiv@iitd.ac.in

### ELECTROCHEMICAL STUDIES

**Table S1** | Areal and volumetric capacitance of neat cPAN based three-electrode system at varying current density values.

| Sample    | Current Density (mAcm <sup>-2</sup> ) | Discharge Time (s) | Potential Window (V) | Area (cm <sup>2</sup> ) | Weight (mg) | Areal Capacitance (mF/cm <sup>2</sup> ) | Volumetric Capacitance (F/g) |
|-----------|---------------------------------------|--------------------|----------------------|-------------------------|-------------|-----------------------------------------|------------------------------|
| Neat cPAN | 0.8                                   | 33                 | 1.1                  | 1                       | 2           | 24.00                                   | 12.00                        |
|           | 1.0                                   | 17                 | 1.1                  | 1                       | 2           | 15.45                                   | 7.73                         |
|           | 1.2                                   | 9                  | 1.1                  | 1                       | 2           | 9.82                                    | 4.91                         |
|           | 1.4                                   | 5                  | 1.1                  | 1                       | 2           | 6.36                                    | 3.18                         |
|           | 1.6                                   | 3                  | 1.1                  | 1                       | 2           | 4.36                                    | 2.18                         |

**Table S2** | Areal and volumetric capacitance of 0.1 mg GQDs coated cPAN based three-electrode system at varying current density values.

| Sample                  | Current Density (mAcm <sup>-2</sup> ) | Discharge Time (s) | Potential Window (V) | Area (cm <sup>2</sup> ) | Weight (mg) | Areal Capacitance (mF/cm <sup>2</sup> ) | Volumetric Capacitance (F/g) |
|-------------------------|---------------------------------------|--------------------|----------------------|-------------------------|-------------|-----------------------------------------|------------------------------|
| 0.1 mg GQDs coated cPAN | 0.6                                   | 1121               | 1.1                  | 1                       | 2.1         | 611.45                                  | 291.17                       |
|                         | 0.8                                   | 617                | 1.1                  | 1                       | 2.1         | 448.73                                  | 213.68                       |
|                         | 1.0                                   | 321                | 1.1                  | 1                       | 2.1         | 291.82                                  | 138.96                       |
|                         | 1.2                                   | 124                | 1.1                  | 1                       | 2.1         | 135.27                                  | 64.42                        |
|                         | 2.0                                   | 23                 | 1.1                  | 1                       | 2.1         | 41.82                                   | 19.91                        |

**Table S3** | Areal and volumetric capacitance of 0.4 mg GQDs coated cPAN based three-electrode system at varying current density values.

| Sample                  | Current Density (mAcm <sup>-2</sup> ) | Discharge Time (s) | Potential Window (V) | Area (cm <sup>2</sup> ) | Weight (mg) | Areal Capacitance (mF/cm <sup>2</sup> ) | Volumetric Capacitance (F/g) |
|-------------------------|---------------------------------------|--------------------|----------------------|-------------------------|-------------|-----------------------------------------|------------------------------|
| 0.4 mg GQDs coated cPAN | 2.0                                   | 1036               | 1.1                  | 1                       | 2.4         | 1883.64                                 | 784.85                       |
|                         | 3.0                                   | 516                | 1.1                  | 1                       | 2.4         | 1407.27                                 | 586.36                       |
|                         | 4.0                                   | 219                | 1.1                  | 1                       | 2.4         | 796.36                                  | 331.82                       |

**Table S4** | Areal and volumetric capacitance of 0.1 mg GQDs coated cPAN based two-electrode system at varying current density values.

| Sample                  | Current Density (mAcm <sup>-2</sup> ) | Discharge Time (s) | Potential Window (V) | Area (cm <sup>2</sup> ) | Weight (mg) | Areal Capacitance (mF/cm <sup>2</sup> ) | Volumetric Capacitance (F/g) |
|-------------------------|---------------------------------------|--------------------|----------------------|-------------------------|-------------|-----------------------------------------|------------------------------|
| 0.1 mg GQDs coated cPAN | 0.4                                   | 289.00             | 1.1                  | 1.76                    | 3.7         | 59.71                                   | 28.40                        |
|                         | 0.6                                   | 155.88             | 1.1                  | 1.76                    | 3.7         | 48.31                                   | 22.98                        |
|                         | 0.8                                   | 93.67              | 1.1                  | 1.76                    | 3.7         | 38.71                                   | 18.41                        |
|                         | 1.0                                   | 59.69              | 1.1                  | 1.76                    | 3.7         | 30.83                                   | 14.67                        |
|                         | 2.0                                   | 5.67               | 1.1                  | 1.76                    | 3.7         | 5.86                                    | 2.79                         |

**Table S5** | Energy density and power density of neat cPAN, 0.1 and 0.4 mg GQDs coated cPAN based three-electrode system, 0.1 mg GQDs coated two-electrode system at varying current density values.

| Neat cPAN                                      |                                              | 0.1 mg GQDs coated<br>three-electrode          |                                              | 0.4 mg GQDs coated<br>three-electrode          |                                              | 0.1 mg GQDs coated<br>two-electrode            |                                              |
|------------------------------------------------|----------------------------------------------|------------------------------------------------|----------------------------------------------|------------------------------------------------|----------------------------------------------|------------------------------------------------|----------------------------------------------|
| Energy<br>Density<br>( $\mu\text{Whcm}^{-2}$ ) | Power<br>Density<br>( $\mu\text{Wcm}^{-2}$ ) |
| 102.76                                         | 330                                          | 4.03                                           | 440                                          | 316.56                                         | 1100                                         | 10.03                                          | 125                                          |
| 75.41                                          | 440                                          | 2.60                                           | 550                                          | 236.50                                         | 1650                                         | 8.12                                           | 187.5                                        |
| 49.04                                          | 550                                          | 1.65                                           | 660                                          | 133.83                                         | 2200                                         | 6.50                                           | 250                                          |
| 22.73                                          | 660                                          | 1.07                                           | 770                                          | 116.88                                         | 2750                                         | 5.18                                           | 312.5                                        |
| 7.03                                           | 1100                                         | 0.73                                           | 880                                          | 76.08                                          | 3300                                         | 0.98                                           | 625                                          |

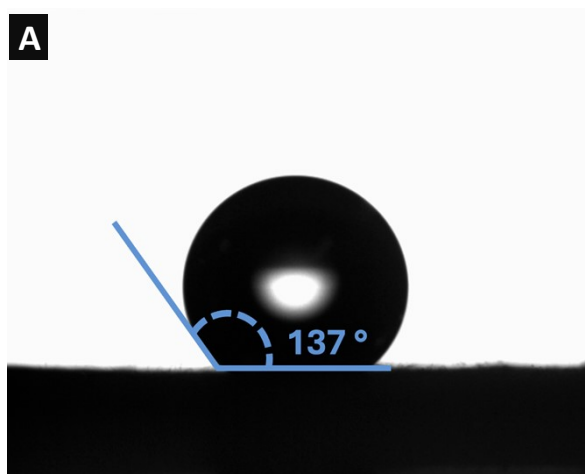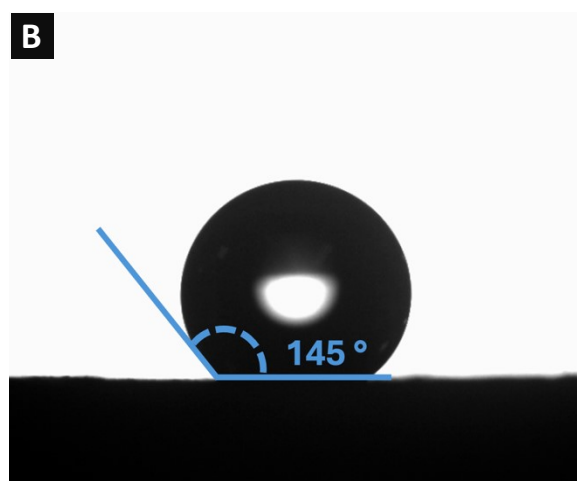

**Figure S1** | Contact angle measurement of (A) neat cPAN fibre (137°) and (B) GQDs coated cPAN (145°).

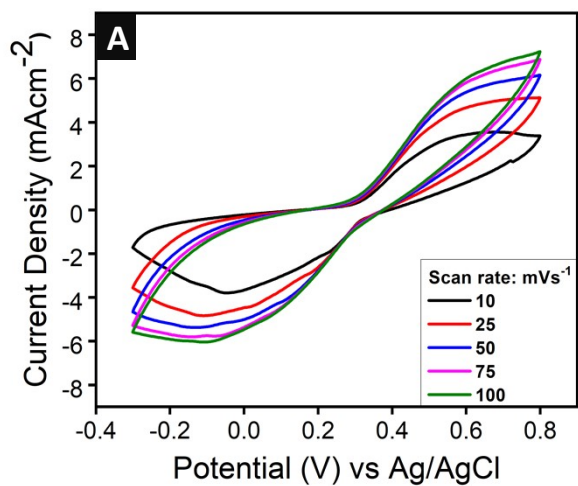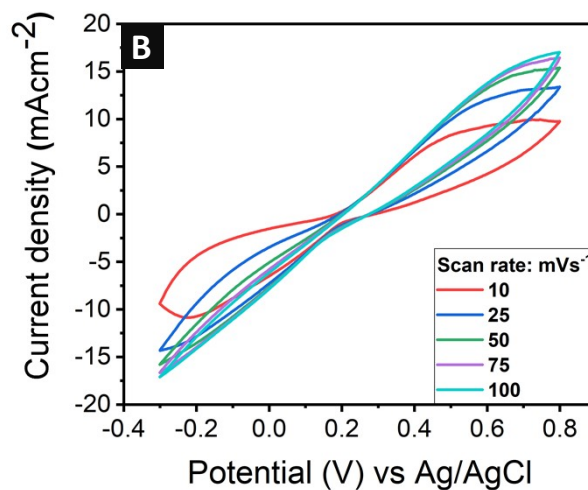

**Figure S2** | (A) CV curves of 0.4 mg GQDs coated cPAN matrices collected under various scan rates. (B) CV curves of 0.1 mg GQDs coated cPAN matrix collected under various scan rates.

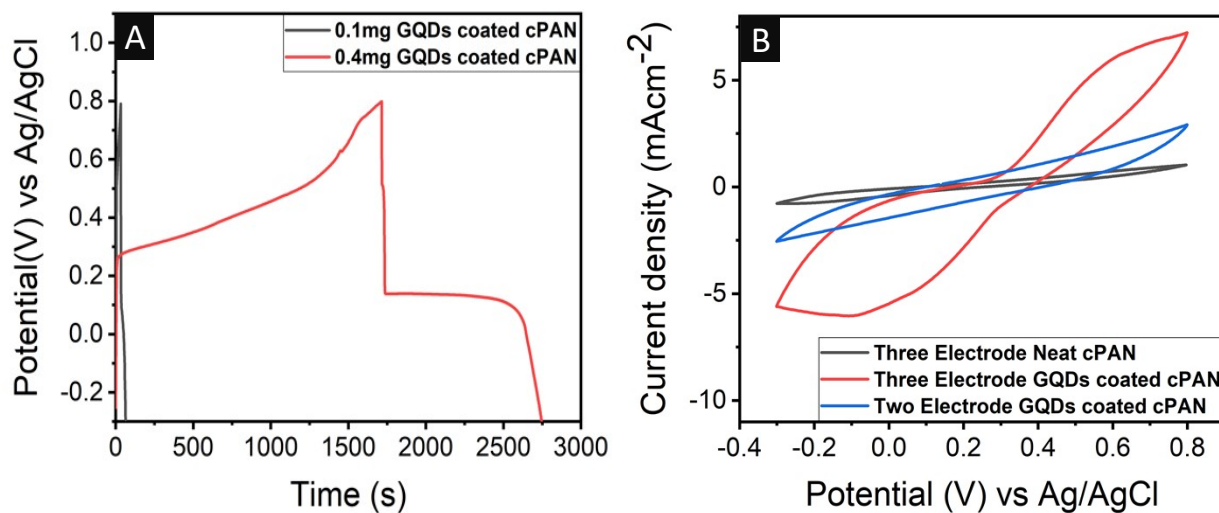

**Figure S3** | (A) GCD curve collected for 0.1 mg and 0.4 mg GQDs coated cPAN matrices. (B) CV curves of neat cPAN and 0.1 mg GQDs coated cPAN matrices collected with three- and two-electrode system-based supercapacitor.



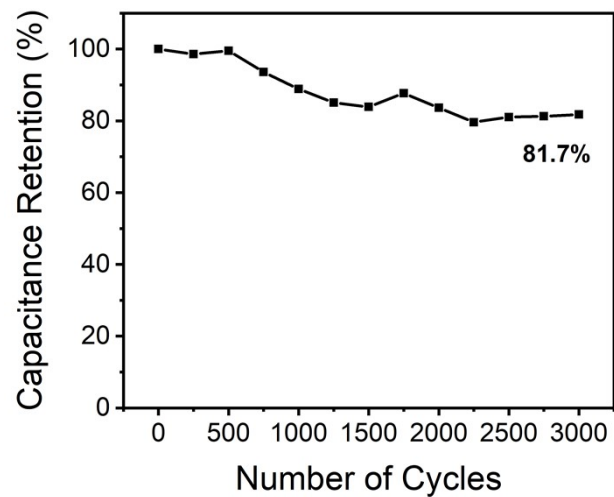

**Figure S4** | 0.1 mg GQDs coated cPAN matrix capacitance retention for 3000 cycles in three-electrode supercapacitor.

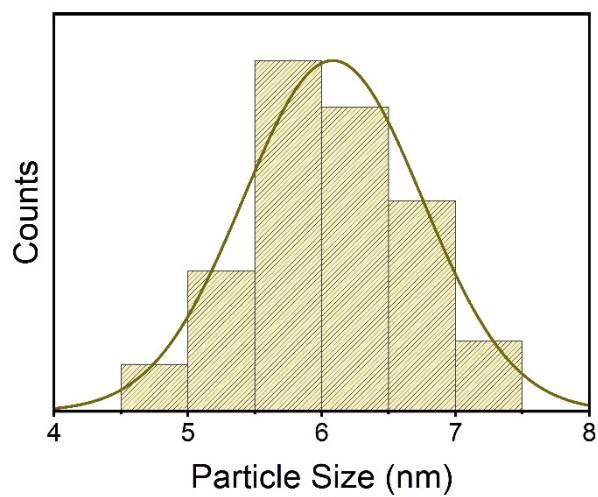

**Figure S5** | GQDs particle size distribution graph calculated from TEM image.

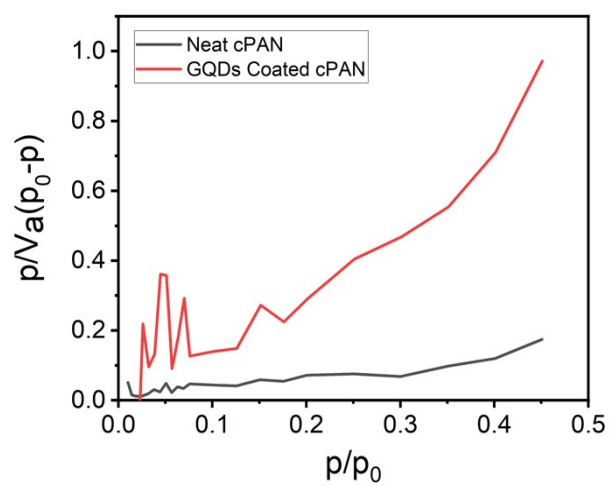

**Figure S6** | BET (Brunauer-Emmett-Teller) of neat cPAN and GQDs coated cPAN fibre.

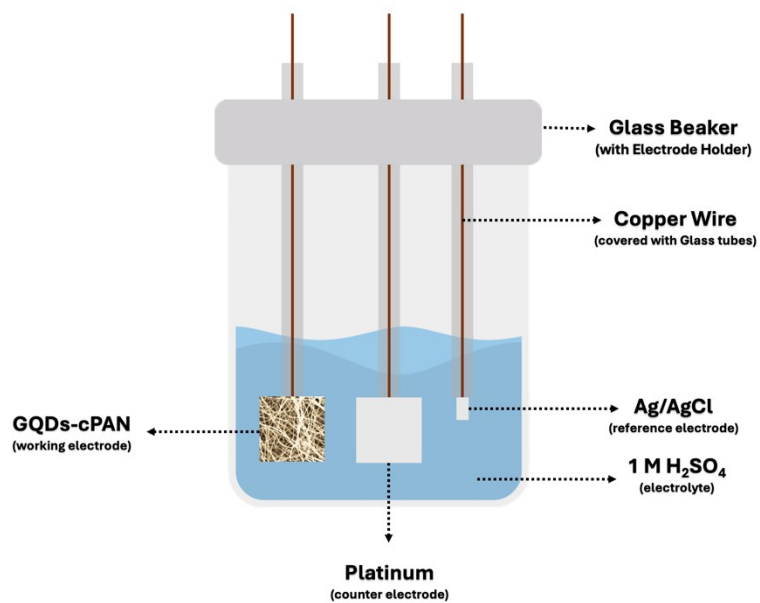

**Figure S7** | Schematic of the three-electrode electrochemical system.
